# Supplementary material for: Investigation of microplastics in urban rivers of Eastern China in summer: abundance, characteristics and ecological risk assessment
Source: Royal Society of Chemistry journal article supplement (doi:10.1039/d4em00153b), 2024-01-01
Supplement: d4em00153b1.pdf [file d4em00153b1.pdf]

## Supporting information

### **Abundance, characteristics, and risk assessment of microplastics in summer of urban river eastern China**

Luming Wang<sup>a</sup>, Juan Huang<sup>a,\*</sup>, Ming Chen<sup>b</sup>, Hui Jin<sup>b</sup>, Yufeng Wu<sup>a</sup>, Xuan Chen<sup>a</sup>

<sup>a</sup> Department of Municipal Engineering, School of Civil Engineering, Southeast University, Nanjing, 210096, China.

<sup>b</sup> Nanjing Research Institute of Environmental Protection, Nanjing 210008, China.

|                                                                                                                                                                                                |    |
|------------------------------------------------------------------------------------------------------------------------------------------------------------------------------------------------|----|
| <i>Fig.S1 Photographs of typical microplastics identified by microscopes</i>                                                                                                                   | 2  |
| <i>Fig.S2 ATR-Fourier transform infrared spectra (FTIR) of the selected microplastics</i>                                                                                                      | 3  |
| <i>Fig.S3 PCA analysis of MPs concentration and characteristics</i>                                                                                                                            | 4  |
| <i>Fig.S4 The potential risk index of different polymer type (Delete PC and PVC)</i>                                                                                                           | 5  |
| <i>Table.S1 Sampling locations for microplastics of Qinhuai River in Nanjing, eastern China</i>                                                                                                | 6  |
| <i>Table S2 Hazard scores for microplastic polymers</i>                                                                                                                                        | 7  |
| <i>Table S3: Categories employed in the microplastics polymeric risk assessment (H), pollution loading index (PLI)</i>                                                                         | 8  |
| <i>Table S4 Risk level criteria for microplastic pollution</i>                                                                                                                                 | 9  |
| <i>Table S5 Risk level criteria for microplastic pollution (Exclude PC and PVC content)</i>                                                                                                    | 10 |
| <i>Table S6 The value of the pollution load index in each sampling sites (<math>C_{0i}</math> takes mean value of 218 items/L and 278 items/L in Plum rain and Typhoon rain, respectively)</i> | 11 |

*Fig.S1 Photographs of typical microplastics identified by microscopes*

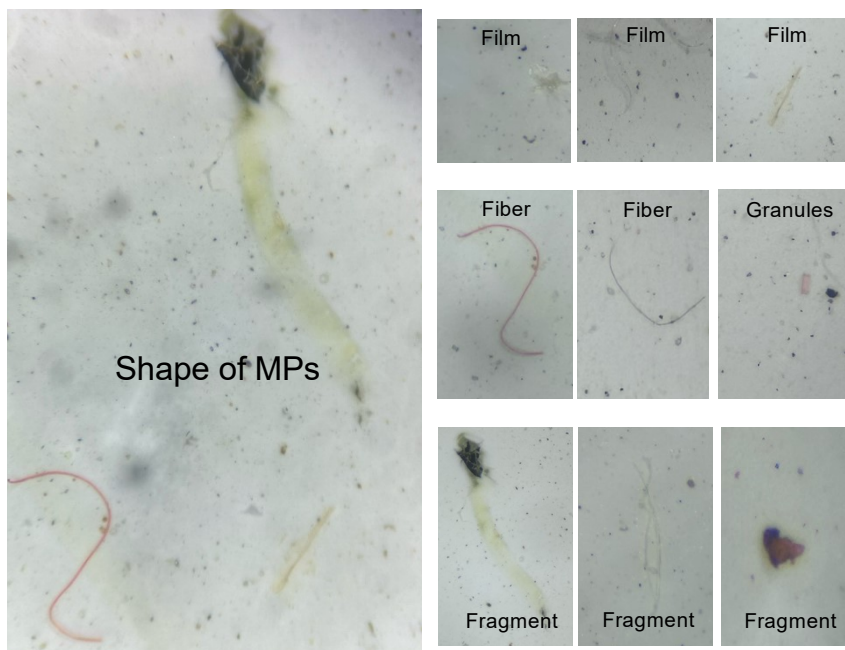

*Fig.S2* ATR-Fourier transform infrared spectra (FTIR) of the selected microplastics

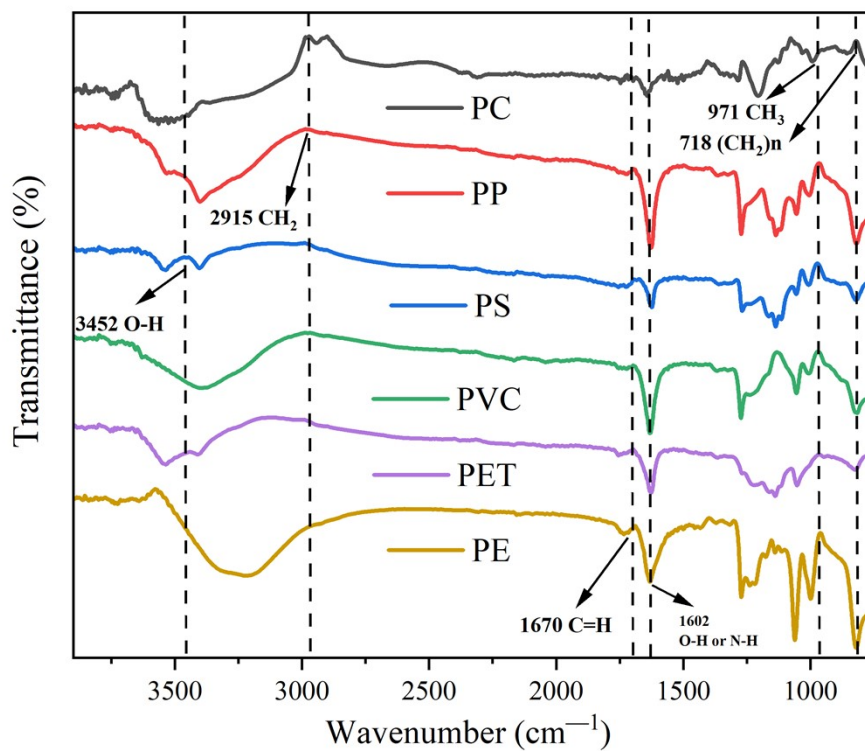

**Fig.S3** PCA analysis of MPs concentration and characteristics

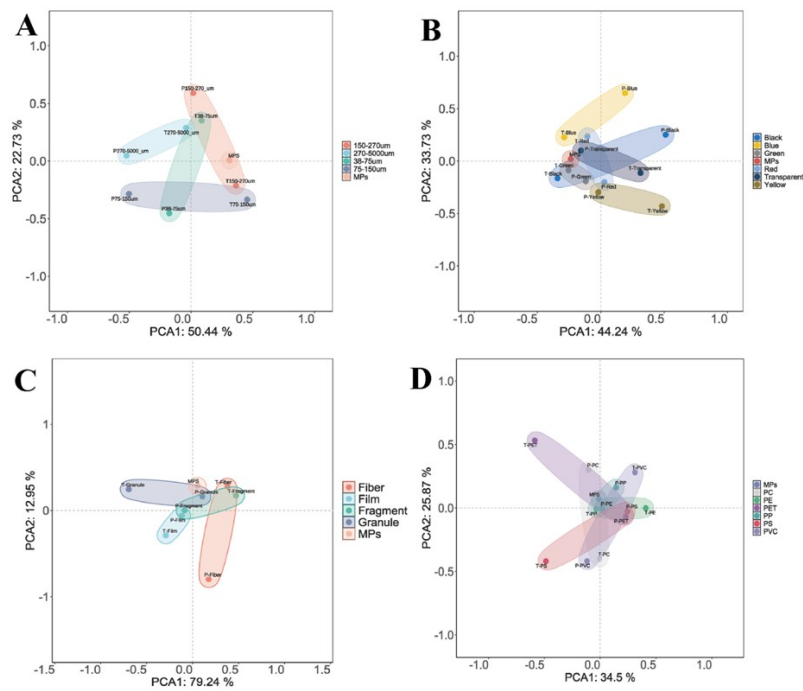

The correlation between microplastic concentration and characteristics in different rain seasons can be observed by principal component analysis (PCA). T represents typhoon rain seasons, while P represents plum rain seasons (Fig.S3). Microplastic concentrations are easier to correlate with typhoon rain seasons (Fig.S3A and Fig.3B). The abundance of MPs was significant with the small-sized MPs (75-150 µm and 38-75 µm) and colors of red, green and blue. In contrast, microplastics are more related to polymer type in the plum rain season, with the predominant correlation of PP, PE and PET (Fig. S3D). For the shape of microplastics, the correlation was revealed to the Fragment instead of the rainy seasons (Fig. S3C).

**Fig.S4** The potential risk index of different polymer type (Delete PC and PVC)

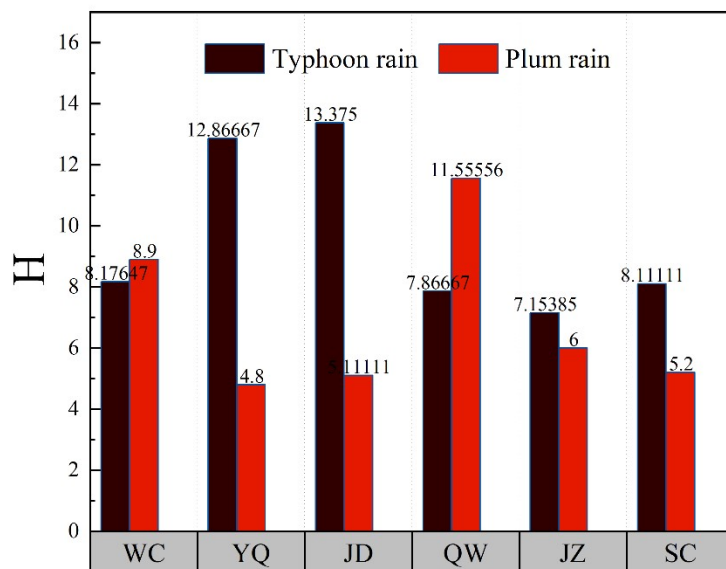

**Table.S1** Sampling locations for microplastics of Qinhuai River in Nanjing, eastern China

| Sampling sites | Location             | Longitude (E) | Latitude (N) |
|----------------|----------------------|---------------|--------------|
| WC             | Wucha Bridge         | 118.90        | 31.77        |
| YQ             | Yang Qiao(Bridge)    | 118.85        | 31.88        |
| JD             | Jiangjundadao Bridge | 118.77        | 31.96        |
| QW             | Qiqiaowen Bridge     | 118.83        | 32.01        |
| JZ             | Jiezhi Estuary       | 118.67        | 31.96        |
| SC             | Sancha Estuary       | 118.73        | 32.08        |

**Table S2 Hazard scores for microplastic polymers**

| Polymer | Hazard score (highest level) |
|---------|------------------------------|
| PP      | 1                            |
| PET     | 4                            |
| PE      | 11                           |
| PS      | 30                           |
| PVC     | 10551                        |
| PA      | 47                           |
| PC      | 1177                         |

**Table S3: Categories employed in the microplastics polymeric risk assessment (H),**

**pollution loading index (PLI)**

| items                      | Ecological risk level |        |          |       |
|----------------------------|-----------------------|--------|----------|-------|
|                            | I                     | II     | III      | IV    |
| Ecological Risk Index (H)  | <10                   | 10-100 | 101-1000 | >1000 |
| Pollution Load Index (PLI) | <10                   | 10-20  | 20-30    | >30   |



**Table S4 Risk level criteria for microplastic pollution**

| Value of the polymer index (H) | <10 | 10-100 | 100-1000                   | >1000                                                                  |
|--------------------------------|-----|--------|----------------------------|------------------------------------------------------------------------|
| Typhoon rain<br>August         |     |        | JD (819.94)<br>SC (138.89) | WC (2008.59)<br>YQ (1498.13)<br>QW (2821.47)<br>JZ (2623.08)           |
|                                |     |        | JZ (398.33)                | WC (1181.7)<br>YQ (1177.6)<br>JD (1439)<br>QW (1445.44)<br>SC (4225.6) |
| Plum rain<br>June              |     |        |                            |                                                                        |
| Risk category                  | I   | II     | III                        | IV                                                                     |

**Table S5 Risk level criteria for microplastic pollution (Exclude PC and PVC content)**

| Value of the polymer index (H) | <10        | 10-100     | 100-1000 | >1000 |
|--------------------------------|------------|------------|----------|-------|
| Typhoon rain<br>August         | WC (8.18)  |            |          |       |
|                                | YQ (12.87) |            |          |       |
|                                | QW (7.87)  | JD (13.38) |          |       |
|                                | JZ (7.15)  |            |          |       |
|                                | SC (8.11)  |            |          |       |
| Plum rain<br>June              | WC (8.9)   |            |          |       |
|                                | YQ (4.8)   |            |          |       |
|                                | JD (5.11)  | QW (11.56) |          |       |
|                                | QW (6)     |            |          |       |
|                                | SC (5.2)   |            |          |       |
| Risk category                  | I          | II         | III      | IV    |

**Table S6** The value of the pollution load index in each sampling sites ( $C_{0i}$  takes mean value of 218 items/L and 278 items/L in Plum rain and Typhoon rain, respectively)

| Sampling sites | Value of the pollution load index (PLI) |           |
|----------------|-----------------------------------------|-----------|
|                | Typhoon rain                            | Plum rain |
| WC             | 1.48                                    | 1.22      |
| YQ             | 1.49                                    | 1.05      |
| JD             | 1.34                                    | 1.23      |
| QW             | 1.84                                    | 1.25      |
| JZ             | 1.19                                    | 1.48      |
| SC             | 1.53                                    | 1.35      |
